# Supplementary material
Source: Research Square preprint supplement (doi:10.21203/rs.3.rs-9531514/v1)

**SUPPLEMENTAL FILE 1**

**Translated Interview Guide (English Version)**

**Introduction**

Hello! This interview aims to explore your genuine experiences, challenges, emotions, and needs related to caring for an post-stroke disabled older adults, and to clarify the influencing factors and formation mechanisms of third-party disability among family caregivers. All data will be used exclusively for academic research and will remain strictly confidential and anonymous.

**Background**

- Please briefly describe your age, occupation, and family background.
- What is your relationship to the care recipient? How long have you been providing care?
- Do you provide care independently, or do you share this responsibility with family members, friends, or others?
- How would you describe your current physical health, sleep quality, and emotional state?

**Care Experience**

- Please describe your overall experience of caring for an post-stroke disabled older adults.
- In what ways has caregiving impacted your daily life?

**Patient’s Functional Impairments and Caregiving Pressure**

- What are the primary functional limitations experienced by the care recipient?
- What physical strains or injuries have resulted from these caregiving demands?
- What communication challenges do you encounter when the recipient cannot clearly express their needs?

**Daily Care Activities and Care Burden**

- What daily care activities do you regularly assist the recipient with?
- How much time and energy do these tasks require?
- What is the most challenging aspect of providing long-term care?

**Social Participation and Role Conflict**

- Are you still able to maintain your work, social life, and regular outdoor activities?
- Have you had to give up personal pursuits, career development, or leisure activities due to caregiving?
- Have you experienced role conflicts related to your multiple identities?

**Living Environment and Environmental Barriers**

- Are there any obstacles or inconveniences in your home or living environment?
- Have these environmental barriers increased the difficulty or physical burden of caregiving?
- Do you perceive differences between urban and rural caregiving environments and resources?

**Access to Health and Care Services**

- Do you have convenient access to home care, rehabilitation services, or long-term care insurance support?
- What difficulties have you encountered in accessing medical treatment, rehabilitation, or professional guidance?
- Can you obtain timely assistance during nighttime emergencies?

**Personal Fit with Caregiving Requirements**

- Do you feel your physical condition, age, and abilities match the intensity of caregiving?
- Do you experience anxiety due to insufficient caregiving knowledge or skills?
- Which aspects of caregiving do you find most difficult to fulfill?

**Mental Well-being and Emotional Exhaustion**

- What negative emotions have you experienced as a result of long-term caregiving?
- What situations most frequently trigger low mood, frustration, or emotional overwhelm?
- How has your psychological state and resilience changed throughout your caregiving journey?

**Social Support**

- What forms of support do you receive from family, friends, and the community?
- To what extent does shared care alleviate your overall burden?
- What type of support do you need most?

**Positive Experiences and Coping Strategies**

- Have you experienced any rewarding, fulfilling, or meaningful moments during caregiving?
- How do you typically regulate your emotions and relieve stress?
- What motivates or sustains you to continue providing care?

**Future Perspectives**

- What are your greatest concerns regarding future caregiving?
- What forms of assistance or support do you most hope to receive?
- Is there anything else you would like to share that has not been addressed?

**SUPPLEMENTAL FILE 2**

**Code tree**


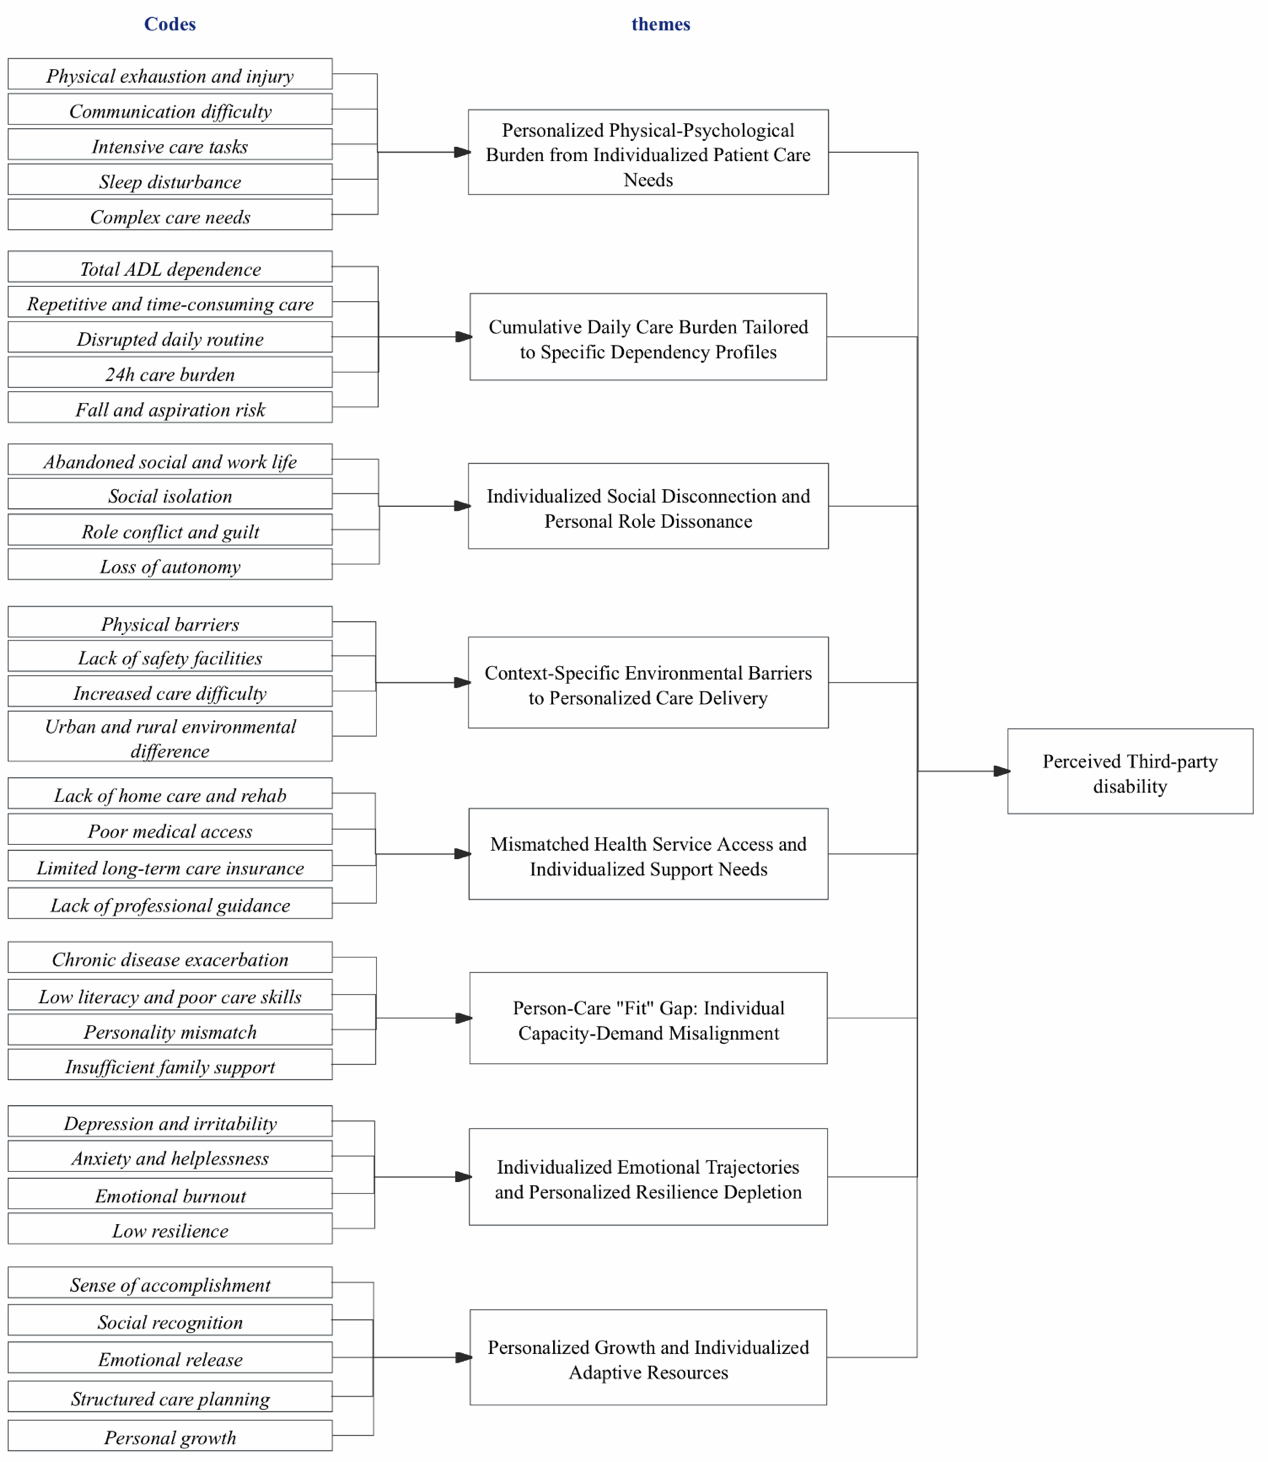

Supplement: Supplementary file 1 [file 4aa0906b894ed33ccecbe041.docx]
