# Supplementary material
Source: Research Square preprint supplement (doi:10.21203/rs.3.rs-9531514/v1)
Supplement: Supplementary file 2 [file 56e7a9d92f509b2c250afff0.docx]

**A Person-Centered Mixed-Methods Analysis of Third-Party Disability Among Family Caregivers of Post-Stroke Disabled Older Adults: Identifying Modifiable Determinants for Tailored Support**

Na Li1a, Jiayi Yu2a, Yongqing Zhang3, Jiawen Qin4, Yili Gao4, Yang Liao5, Xiaoshan Rong5 and Haiping Yu1*

* Correspondence: pingping670@sina.com

Full list of author information is available at the end of the article

a Na Li and Jiayi Yu contributed to the work equally and should be regarded as co-first authors

**Abstract**

**Background** Long-term care for post-stroke disabled older adults places family caregivers at high risk of severe third-party disability (TPD). Prior research has predominantly used single quantitative or qualitative designs, with a lack of integrated mixed-methods studies. This study explored TPD determinants in these caregivers to inform evidence-based personalized interventions.

**Methods** A convergent mixed-methods design was used. From January to November 2025, 796 caregiver-patient dyads were conveniently sampled from two tertiary hospitals in Shanghai. Data were collected using a sociodemographic and caregiving-related questionnaire, the Third-Party Disability Assessment Scale for Family Caregivers of Post-Stroke Disabled Older Adults (TPDAS-FCPSD), the Simplified Coping Style Questionnaire (SCSQ), the Social Support Rating Scale (SSRS), the General Self-Efficacy Scale (GSES), the 10-item Connor-Davidson Resilience Scale (CD-RISC-10), the 7-item Generalized Anxiety Disorder scale (GAD-7), and the Patient Health Questionnaire-9 (PHQ-9). Multivariate stepwise linear regression was performed for quantitative data analysis. In December 2025, 23 caregivers were purposively selected for semi-structured interviews, with thematic analysis for coding. From January to February 2026, a joint display approach integrated quantitative and qualitative findings.

**Results** Caregivers had a mean age of 56.1 ± 14.4 years (57.5% female) and post-stroke disabled older adults 68.0 ± 8.2 years (68.8% male); nearly 70% of the latter had moderate-to-severe disability. The mean TPDAS-FCPSD score was 34.76 ± 18.15. Quantitative analyses identified two independent TPD risk factors (disability severity among post-stroke disabled older adults, caregiver depressive symptoms) and three key protective factors (number of co-caregivers, social support, resilience); Caregiver demographics and simplified coping style showed no significant associations. Qualitative analyses further revealed unmeasured contributors: combined physical-speech dysfunction burden, environmental barriers, inadequate health services and person-care demand mismatch. Integrated findings confirmed qualitative results expanded quantitative observations by clarifying social support structure, physical-speech impairment synergies and care fitness mismatch. Co-caregivers protected all four TPD dimensions; social support influenced all dimensions, depressive symptoms and total disability affected the first three, and sibling number only impacted environmental adaptation.

**Conclusions** TPD in family caregivers of post-stroke disabled older adults stems from complex multidimensional interactions of caregiver traits, clinical status of post-stroke disabled older adults, social support and environmental factors. This mixed-methods study fully identifies TPD’s influencing factors and mechanisms, providing theoretical and practical evidence to reduce caregiver burden, optimize home-based care models and advance healthy aging.

**Keywords** Third-party disability, Family caregiver, Person-centered care, Older adults, Post-stroke, ICF, Mixed methods research, Tailored interventions, Caregiver empowerment

**Background**

Stroke remains the second leading cause of death and the third leading cause of disability-adjusted life years lost worldwide, representing a major public health challenge that urgently requires targeted intervention [1]. Data from the 2019 Global Burden of Disease Study indicate more than 12.2 million new stroke cases occur globally each year [2]. As a country bearing a substantial stroke burden, China accounts for approximately 3.94 million new cases annually, representing one-third of the global total, with two-thirds of these cases occurring in older adults [3-5]. Among older stroke survivors, an estimated 75%–92% develop permanent physical, speech, or swallowing impairments, making this group the largest segment of disabled older adults who rely heavily on full-time care from family members [6, 7]. This demographic reality underscores the critical intersection of stroke care, aging populations, and family-based caregiving systems that characterizes contemporary health policy challenges across both high- and middle-income settings.

Current person-centered care (PCC) paradigms in stroke rehabilitation emphasize holistic, individualized approaches that respect patient preferences and family involvement [1, 8]. Grounded in McCormack and McCance's Person-Centred Practice Framework [9], PCC encompasses caregiver prerequisites (capacity, resilience), care environment (social support, physical accessibility), and person-centred processes (tailored engagement matching individual needs) . However, PCC implementation often focuses primarily on stroke survivors while inadequately addressing family caregivers' own health needs and personalized support requirements [8, 10]. Prolonged and intensive caregiving not only severely compromises the physical and mental health of family caregivers but also imposes a heavy dual burden on families and society [8, 10]. Family caregivers of post-stroke disabled older adults are particularly vulnerable to TPD—a construct defined by the WHO within the ICF framework as impairments in functioning and social participation among family members resulting from the health conditions of their close relatives [11]. This conceptualization aligns with PCC principles, which recognize that optimal health outcomes require attention to the interdependent well-being of patients and their care networks, and that caregivers themselves are "persons" with unique needs, preferences, and capacities requiring individualized support [12, 13]. As an important indicator for evaluating the physical and psychological health deterioration of caregivers caused by caregiving responsibilities, TPD has received extensive research attention [14].

Previous quantitative studies have preliminarily identified factors associated with TPD, including longer disease course, poorer patient health status, comorbid psychological symptoms in patients, advanced caregiver age, and inadequate social support [10, 15]. Building on these findings, our research team has previously conducted a qualitative exploration of TPD among family caregivers of post-stroke disabled older adults in Mainland China, based on the ICF framework [15]. Yet, to inform truly person-centered, tailored interventions, there remains a critical need to identify modifiable determinants that can guide individualized caregiver support strategies—an evidence gap this mixed-methods study addresses through systematic integration of quantitative predictive modeling with in-depth qualitative exploration of caregivers' lived experiences [14, 16].

Although existing studies have preliminarily explored factors associated with TPD, they still have notable methodological limitations [17, 18]. Most studies have adopted either quantitative or qualitative designs alone [15, 16, 18], lacking systematic integration of findings from both approaches. This methodological fragmentation is particularly problematic for advancing PCC, which requires both robust evidence on modifiable risk factors (to enable targeted screening) and rich understanding of individual caregivers' unique contexts (to enable tailored intervention design) [1, 16]. Quantitative research can identify statistical correlations among variables but fails to deeply illuminate the underlying caregiving experiences and mechanisms explaining why caregivers develop TPD [19]. In contrast, qualitative research can authentically capture the real‑life challenges of caregivers but cannot verify the generalizability of results [16]. Such limitations inherent in single‑method designs may lead to the omission of key influencing factors [20]. Previous evidence has confirmed that a convergent mixed-methods design can leverage the strengths of both approaches to generate actionable, person-centered insights [16]. This design not only enables standardized measurement of TPD severity and its correlates for risk stratification but also empowers caregivers to describe their lived experiences, preferences, and unmet needs in their own words—essential data for designing respectful, responsive, individualized interventions [14, 16].

Of note, TPD among family caregivers of post-stroke disabled older adults is not merely an individual health problem. It not only directly impairs caregivers’ physical and mental health but also tends to create a vicious cycle in which caregiver health decline leads to reduced care quality and further health deterioration in post-stroke disabled older adults, thereby increasing the risk of complications such as pressure ulcers and pulmonary infections [10]. This interdependence underscores the imperative for person-centered, family-inclusive care models that view caregivers and stroke survivors as an integrated care unit [1, 10]. Meanwhile, stable care provided by family caregivers serves as a key pillar in delaying institutional placement of disabled older adults and can effectively reduce the social cost of elderly care [6]. Therefore, person-centered exploration of modifiable TPD determinants—grounded in caregivers' authentic voices—is essential for developing individualized, empowering interventions that safeguard caregiver well-being and optimize sustainable family care models. Aligning with United Nations (UN)-World Health Organization (WHO) Decade of Healthy Ageing (2021-2030) and global calls for person-centered, family-inclusive care, identifying modifiable, individualized determinants of caregiver well-being is essential to developing tailored interventions that empower caregivers as partners in sustainable stroke care systems[11].

Accordingly, this study employed a convergent mixed-methods design to integrate the strengths of quantitative and qualitative data. Specifically, we aimed to: (1) identify modifiable, individualized risk and protective factors for TPD through multivariate regression analysis of cross-sectional data; (2) elucidate caregivers' lived experiences and unmet needs to inform tailored intervention design; and (3) generate an integrated, person-centered evidence base to reduce TPD prevalence and empower family caregivers as partners in stroke care [14, 16].

**Methods**

**Design**

This study employed a convergent mixed-methods design from January 2025 to February 2026, consisting of two sequential phases: a cross-sectional survey and semi-structured in-depth interviews. Integration of the quantitative and qualitative approaches was achieved by recruiting interview participants from the cross-sectional sample and performing integrated data analysis [20]. The study design is illustrated in Figure 1.

2025.01~2025.11

796 pairs of post-stroke disabled older adults and their family caregivers were recruited via convenience sampling

Multiple linear stepwise regression analysis was performed to identify the influencing factors of caregivers' TPD

*Quantitative data collection*

*Quantitative data analysis*

2025.12

23 heterogeneous family caregivers (in age, gender, TPD severity) were selected from the quantitative sample for semi-structured in-depth interviews

*Qualitative data collection*

2026.01~2026.02

*Qualitative data analysis*

Guided by grounded theory and Braun & Clark’s six-step thematic analysis, NVivo 12.0 was used for coding and theme extraction

*Integrating quantitative and qualitative data analysis*

Visual joint displays were used to match quantitative and qualitative data for comparing, confirming, identifying discordances in, and expanding findings from each research strand

Figure 1 Mixed-methods research design

**Study setting and sample**

***Quantitative study***

This study aimed to investigate the status andinfluencing factors of TPD among family caregivers of post-stroke disabled older adults to inform person-centered, individualized support strategies. Given the lack of a validated, population-specific assessment tool for this group, our research team independently developed the TPDAS-FCPSD, which has demonstrated satisfactory reliability and validity and enables personalized assessment across mental, physical, daily activity, and environmental adaptation domains [14].

A cross-sectional survey was conducted at two tertiary teaching hospitals in Shanghai, both of which are designated as key clinical centers for stroke diagnosis, treatment and rehabilitation in East China, with a combined annual admission volume of approximately 8,500 stroke inpatients and a total of 2,780 beds. To address profound population aging, China’s 14th Five-Year Plan for the Development of the Elderly Services and Care System explicitly emphasizes consolidating the fundamental role of family-based elderly care [21]. As China’s most aged megacity, Shanghai has actively implemented national strategies by issuing relevant policies and regulations to establish a coordinated policy framework. Programs such as long-term care insurance and family caregiver support services have been rolled out to promote the concept of aging in place, providing a practical and policy context for the present study [22, 23]. From January to November 2025, participants were recruited using convenience sampling from the two hospitals. Self-developed scales were used to collect data from post-stroke disabled older adults and their family caregivers.

Eligibility criteria for post-stroke disabled older adults were as follows: 1) aged 60 years and above; 2) diagnosed with stroke by cranial CT or MRI; 3) Activities of Daily Living (ADL) score ≤ 60, which was extracted from the patients’ medical records [24, 25]. Eligibility criteria for family caregivers were as follows: 1) aged 18 years and above; 2) provided continuous care for post-stroke disabled older adults for at least 6 months, with a daily care duration of no less than 4 hours, a threshold that has been verified to fully capture the authentic caregiving experiences of family caregivers; 3) family members or close relatives of the post-stroke disabled older adults, living with them, and serving as the primary caregiver; 4) no communication barriers, informed and voluntarily participated in the study. Exclusion criteria for family caregivers were: 1) providing care for other dependent family members at the same time; 2) paid caregivers with employment relationships; 3) visual, auditory and speech impairments; 4) suffering from severe diseases such as cancer and serious cardiovascular diseases.

According to Kendall’s sample size estimation method, the required sample size for multiple linear regression is 5–10 times the number of independent variables [26]. With 10 independent variables included in this study and a 20% anticipated dropout rate, the minimum required sample size was calculated to be 120. Given the heterogeneity of stroke disability severity and caregiver profiles, a larger sample was targeted to ensure adequate statistical power for subgroup analyses (e.g., by disability level, urban-rural residence, and caregiver relationship), enhance the stability of regression estimates, and improve the generalizability of findings across diverse care contexts." Data were collected through paper questionnaires with full guidance and completeness checks to ensure no missing data. This study was approved by the Medical Ethics Committee of Shanghai Tongji University Affiliated Dongfang Hospital, approval number: [2024] Res. Review No. (127), in accordance with the Declaration of Helsinki. Written informed consent was obtained from all participants.

***Qualitative study***

During the quantitative survey phase, interview willingness was solicited from all participants. From the 796 valid questionnaire respondents, 589 volunteers were identified. Based on key variables including caregivers’ TPD scores, demographic characteristics, and the disability severity of the post-stroke disabled older adults, 56 heterogeneous caregivers were initially screened. Finally, 23 participants were selected using maximum variation purposive sampling to undergo semi-structured in-depth interviews. Sample size was determined by data saturation: no new themes emerged after the 20th interview, with the subsequent 3 interviews validating saturation (no new information), confirming 23 participants sufficed for thematic analysis. Written informed consent was obtained from all interviewees.

**Data collection and measurement**

***Quantitative study***

*Dependent variable*  *Third-Party Disability Assessment Scale for Family Caregivers of* *Post-Stroke Disabled Older Adults (**TPDAS-FCPSD)* This scale was independently developed by our research team and validated with satisfactory reliability and validity [14]. It comprises 26 items across four domains: mental function, physical function, daily activity, and environmental adaptation—enabling personalized, multidimensional assessment of caregiver functioning to inform tailored intervention matching. The scale uses a 5-point Likert scoring system (0 = never, 4 = always), with higher total scores indicating more severe TPD as perceived by family caregivers. Scores are classified into three levels: mild (0 ≤ score ≤ 22), moderate (23≤ score ≤44), and severe (45≤ score ≤104). In the present study sample, the overall Cronbach’s α coefficient of the scale was 0.89, and the Cronbach’s α values for the four domains ranged from 0.83 to 0.90; the split-half reliability was 0.78, and the two-week test–retest reliability was 0.94.

*Assessments among family caregivers Simplified Coping Style Questionnaire (SCSQ)* The SCSQ was developed by Xie [27] in 1998. It comprises 20 items across two domains: positive coping and negative coping. Each item is rated on a 4-point Likert scale, with higher domain scores indicating more frequent use of the corresponding coping style. In this study sample, the Cronbach’s α coefficients for the positive coping, negative coping domains and the total scale were 0.81, 0.76 and 0.79, respectively.

*Social Support Rating Scale (SSRS)* The SSRS was developed by Xiao [28] in 1986. It includes 10 items covering three domains: objective support, subjective support, and utilization of support. Higher total scores reflect greater social support. Scores are classified into three levels: low (< 33), moderate (33–45), and high (> 45). The Cronbach’s α coefficient for the total scale was 0.84 in the present study sample, with domain α values of 0.80 (objective support), 0.82 (subjective support) and 0.78 (utilization of support).

*General Self-Efficacy Scale (GSES)* The GSES was originally developed by Schwarzer et al. [29] in 1981 and validated in Chinese by Wang et al. [30] in 2001. The Chinese version is unidimensional with 10 items, scored on a 4-point Likert scale (total score range: 10–40). Higher scores indicate stronger general self-efficacy. In this study sample, the Cronbach’s α coefficient of the GSES was 0.83.

*10-item Connor-Davidson Resilience Scale (CD-RISC-10)* The CD-RISC-10 was refined by Campbell-Sills et al. [31] and translated into Chinese by Zhang et al. [32]. It contains 10 items rated on a 5-point Likert scale (total score range: 10–50). In the present study sample, the Cronbach’s α coefficient of the scale was 0.88.

*Generalized Anxiety Disorder-7 (GAD-7)*The GAD-7 was developed by Spitzer et al. [33] in 2006 and Chinese-version validated by He et al. [34] in 2010. It includes 7 items scored on a 4-point scale (0–3), with total scores ranging from 0 to 21. Higher scores indicate more severe anxiety symptoms. Severity is categorized as: none (0–4), mild (5–9), moderate (10–14), and severe (15–21). In this study sample, the Cronbach’s α coefficient of the GAD-7 was 0.80.

*Patient Health Questionnaire-9 (PHQ-9)* The PHQ-9 was developed by Kroenke et al. [35] in 2001 and Chinese-version validated by Bian et al. [36] in 2009. It includes 9 items covering emotional and somatic symptoms, with total scores ranging from 0 to 27. Cut-off scores of 5, 10, and 20 denote mild, moderate, and severe depression, respectively; higher scores indicate a greater likelihood of depression. In the present study sample, the Cronbach’s α coefficient of the PHQ-9 was 0.82.

*Assessments among* *post-stroke disabled older adults Barthel Index (BI)* The BI was developed by Mahoney and Barthel in 1965 and translated into Chinese by Zhang et al. in 2007 [37, 38]. It comprises 10 items assessing ADL, with total scores ranging from 0 to 100. Higher scores indicate greater functional independence. Severity levels are defined as: severe disability (score ≤ 40), moderate disability (score 41–60), mild disability (score 61–99), and full independence (score = 100). In this study sample, the Cronbach’s α coefficient of the BI was 0.86.

*Sociodemographic and other variables* A self-designed questionnaire based on literature review was used to collect sociodemographic and caregiving-related data. Information on post-stroke disabled older adults included age, sex, educational level, marital status, employment status, and duration of disability. Information on family caregivers included age, sex, educational level, marital status, employment status, relationship to the care recipient, total caregiving duration, daily caregiving hours, and number of co-caregivers.

***Qualitative study***

In December 2025, a semi-structured interview guide was developed based on preliminary quantitative findings and PCC [9]. The guide was designed to elicit caregivers' individualized narratives across eight core PCC domains: (1) personalized caregiving experiences and challenges; (2) individual capacity and "fit" with care demands; (3) unique social participation restrictions and role conflicts; (4) specific environmental barriers in their home or community contexts; (5) personalized access needs and health service preferences; (6) individual psychological responses and coping resources; (7) tailored social support requirements; and (8) personally meaningful goals and future care expectations. The guide comprehensively covered key influencing factors of TPD while maintaining both structure and openness, enabling caregivers to freely express their real feelings and personalized care experiences. All face-to-face interviews were conducted by two well-trained researchers (NL and JYY). Each interview lasted 20–50 minutes, with consideration for caregivers’ physical and mental status to avoid additional burden. Written informed consent was obtained from all participants, and all interviews were audio-recorded for subsequent transcription and qualitative analysis.

**Analysis**

***Quantitative study***

Data were entered using EpiData 3.1 and analyzed with IBM SPSS 26.0. Normally distributed continuous data were presented as mean ± standard deviation (mean ± SD) and analyzed using independent-samples t-test, one-way ANOVA, or Pearson correlation. Non-normally distributed continuous data were reported as median (interquartile range) [M (P25, P75)] and analyzed using nonparametric tests or Spearman correlation. Categorical data were described as frequency and percentage [n (%)] and compared using the chi-square or Fisher exact test. Variables with statistical significance in univariate and correlation analyses were included in multivariate stepwise linear regression models. Three models were constructed: Model 1 included caregiver characteristics; Model 2 included patient characteristics; Model 3 included both. Multicollinearity was assessed using the variance inflation factor (VIF); all VIF values ranged from 1 to 4, indicating no significant multicollinearity. All tests were two-sided, and a *P* < 0.05 was considered statistically significant.

***Qualitative study***

Quantitative analyses indicated that caregiver demographic characteristics were not independently associated with TPD, which appeared inconsistent with some previous findings. Therefore, semi-structured in-depth interviews were conducted to explore this inconsistency, identify unmeasured influencing factors, and verify the robustness of quantitative results.

All interviews were audio-recorded with informed consent and transcribed verbatim. Identifiable information was removed, and unique pseudonyms were assigned before data import into NVivo 12.0 for analysis. Thematic analysis was guided by grounded theory and Braun and Clarke’s six-step framework: (1) familiarization with data; (2) initial coding; (3) generation of candidate themes; (4) review of themes against transcripts; (5) definition and naming of themes; (6) production of the final analysis. A detailed code tree is provided in Supplementary data 2. Descriptive statistics were used to summarize sociodemographic and clinical characteristics of participants.

***Integrating qualitative and quantitative findings***

Following independent quantitative and qualitative analyses, a visual joint display approach was used to integrate the two datasets in three complementary manners: qualitative findings corroborated statistically significant quantitative results, clarified why certain variables (e.g., demographic characteristics, coping style) exhibited no significant associations in regression models, and uncovered unmeasured factors (e.g., environmental barriers, person–care mismatch, speech dysfunction) not captured by quantitative scales, thereby comprehensively revealing the influencing factors and mechanisms underlying TPD among family caregivers of post-stroke disabled older adults.

**Validity and reliability**

Validity and reliability were ensured through quantitative and qualitative strategies. For quantitative validity, all research tools were reviewed by experts in geriatric care, qualitative research, and stakeholder representatives (disabled older adults and caregivers). All scales were tailored to the study population, and the self-developed scale was rigorously tested for reliability and validity. For qualitative rigor, we followed Guba and Lincoln’s four criteria: credibility, transferability, dependability, and confirmability [39]. Dual independent coding was conducted by two trained researchers, with discrepancies resolved via consensus meetings. Member checking was performed to verify themes with participants. Reflexivity was maintained through reflective journals to minimize researcher bias. The interview guide, provided in Supplementary data 1, was developed based on quantitative findings and revised by the research team. Heterogeneous sampling (urban and rural, caregiving relationship, TPD severity) enhanced transferability. A joint expert and caregiver meeting further confirmed the confirmability of findings.

**Results**

**Quantitative study**

***Sample description***

A total of 948 questionnaires were distributed, and 796 valid questionnaires were recovered, with an effective response rate of 83.97%, indicating a sufficient sample size for statistical analysis. The demographic and caregiving characteristics of the participants are summarized in Table 1. The mean age of caregivers was 56.1 ± 14.4 years; most were female, had a moderate educational level, were retired, and were predominantly spouses or parents of the post-stroke disabled older adults. More than 70% of caregivers provided more than 8 hours of care daily, and 33.7% had two co-caregivers. The mean age of post-stroke disabled older adults was 68.0 ± 8.2 years; most were male, had a moderate-to-high educational level, and were retired. Nearly 70% of patients had moderate-to-severe disability, more than half had a disability duration of less than 1 year, and 55.6% incurred monthly medical expenses of 4000 yuan or more.

Table 1 Characteristics of family caregivers and post-stroke disabled older adults

|  | Family caregivers of post-stroke disabled older adults (N= 796) | Post-stroke disabled older adults (N= 796) |
| --- | --- | --- |
| **Age, mean ± SD** | 56.1 ± 14.4 | 68.0 ± 8.2 |
| **Women, n (%)** | 458 (57.5) | 248 (31.2) |
| **Education, n (%)** |  |  |
| Primary education | 78 (9.8) | 86 (10.8) |
| Secondary education | 454 (57.0) | 408 (51.3) |
| Higher education | 264 (33.2) | 302 (37.9) |
| **Marital status, n (%)** |  |  |
| Married | 740 (93.0) | 684 (85.9) |
| Unmarried and Cohabiting | 42 (5.2) | 74 (9.3) |
| Divorced and Widowed | 14 (1.8) | 38 (4.8) |
| **Working status, n (%)** |  |  |
| Unemployed | 42 (5.3) | 72 (9.0) |
| Employed | 164 (20.6) | 160 (20.2) |
| Retired | 384 (48.2) | 406 (51.0) |
| Farmers | 98 (12.3) | 118 (14.8) |
| Others | 108 (13.6) | 40 (5.0) |
| **Relationship to older adults, n (%)** |  |  |
| Spouse | 322 (40.5) | n/a |
| Children | 164 (20.6) | n/a |
| Parents | 192 (24.1) | n/a |
| Siblings | 34 (4.3) | n/a |
| Others | 84 (10.5) | n/a |
| **Daily care hours (avg)** |  |  |
| < 4 | 164 (20.6) | n/a |
| 4 ~ 8 | 74 (9.3) | n/a |
| > 8 | 558 (70.1) | n/a |
| **Number of co-caregivers** |  |  |
| None | 70 (8.8) | n/a |
| 1 | 244 (30.6) | n/a |
| 2 | 268 (33.7) | n/a |
| ≥ 3 | 214 (26.9) | n/a |
| **Number of siblings** |  |  |
| None | 90 (11.3) | 106 (13.3) |
| 1 | 112 (14.1) | 116 (14.6) |
| 2 | 136 (17.1) | 120 (15.1) |
| 3 | 160 (20.1) | 140 (17.6) |
| ≥ 4 | 298 (37.4) | 314 (39.4) |
| **Per capita monthly household income (Yuan)** |  |  |
| ≤3000 | 182 (22.9) | n/a |
| 3000 ~ 5000 | 298 (37.4) | n/a |
| ≥5000 | 316 (39.7) | n/a |
| **Monthly medical expenses (Yuan)** |  |  |
| < 1000 | n/a | 58 (7.3) |
| 1000 ~ 1999 | n/a | 56 (7.0) |
| 2000 ~ 2999 | n/a | 56 (7.0) |
| 3000 ~ 3999 | n/a | 184 (23.1) |
| ≥ 4000 | n/a | 442 (55.6) |
| **Degree of disability *** |  |  |
| Mild | n/a | 142 (17.9) |
| Moderate | n/a | 294 (36.9) |
| Severe | n/a | 262 (32.9) |
| Total disability | n/a | 98 (12.3) |
| **Duration of disability (years)** |  |  |
| < 1 | n/a | 424 (53.3) |
| 1 ~ 3 | n/a | 212 (26.6) |
| 3 ~ 5 | n/a | 62 (7.8) |
| 5 ~ 10 | n/a | 58 (7.3) |
| > 10 | n/a | 40 (5.0) |
| **Severity of TPD** |  |  |
| Mild (0-22) | 250 (31.4) | n/a |
| Moderate (23-44) | 332 (41.7) | n/a |
| Severe (45-104) | 214 (26.9) | n/a |
| **TPDAS-FCPSD,** **mean ± SD, Median (P25, P75)** |  |  |
| Mental Functions | 8.69 ± 6.73 | n/a |
| Physical Functions | 9.12 ± 6.28 | n/a |
| Daily Living | 11.92 ± 6.70 | n/a |
| Environmental Adaptation | 4.00（1.00, 6.00） | n/a |
| Total Scale Score | 34.76 ± 18.15 | n/a |
| **Social support** | 42.47 ± 24.33 | n/a |
| **Resilience** | 61.37 ± 19.42 | n/a |
| **General self-efficacy** | 24.19 ± 8.63 | n/a |
| **Anxiety** | 2.90 ± 2.06 | 2.85 ± 2.17 |
| **Depression** | 4.71 ± 2.30 | 2.39 ± 1.58 |
| **Simplified coping style** | 30.08 ± 12.32 | n/a |

***TPD Assessment Scale for Family Caregivers of Post-Stroke Disabled Older Adults***

Among the 796 caregivers, the mean scores on the TPD Assessment Scale were 8.69 ± 6.73 for mental function, 9.12 ± 6.28 for physical function, 11.92 ± 6.70 for daily living, and 4.00 (1.00, 6.00) for environmental adaptation, with a total mean score of 34.76 ± 18.15. Correlation analyses revealed that the total scale score and subscale scores were significantly associated with caregiver and patient characteristics. Specifically, total TPDAS-FCPSD score was strongly negatively correlated with caregiver resilience (*r* = −0.529) and social support (*r* = −0.513), and strongly positively correlated with caregiver depressive symptoms (*r* = 0.549). The mental function subscale showed the strongest correlations with caregiver resilience and depressive symptoms, while the environmental adaptation subscale was more strongly correlated with caregiver social support (*r* = −0.437) and general self-efficacy (*r* = −0.310). Additionally, total and subscale scores were significantly positively correlated with caregiver anxiety, patient anxiety, and patient depression (all *P* < 0.001), but showed no significant correlation with caregiver simplified coping style (*P* > 0.05). Detailed correlation coefficients for each dimension are presented in Table 2.

Table 2 Correlation analysis of total score and subscale scores of TPD among family caregivers of post-stroke disabled older adults (*r* value, n = 796)

|  | Mental Functions | Physical Functions | Daily Living | Environmental Adaptation | Total TPDAS-FCPSD score |
| --- | --- | --- | --- | --- | --- |
| Caregiver social support | -0.399** | -0.395** | -0.345** | -0.437** | -0.513** |
| Caregiver resilience | -0.491** | -0.494** | -0.241** | -0.254** | -0.529** |
| Caregiver general self-efficacy | -0.220** | -0.202** | -0.211** | -0.310** | -0.299** |
| Caregiver anxiety | 0.155** | 0.163** | 0.190** | 0.152** | 0.231** |
| Caregiver depression | 0.454** | 0.447** | 0.384** | 0.313** | 0.549** |
| Patient anxiety | 0.181** | 0.216** | 0.152** | 0.191** | 0.267** |
| Patient depression | 0.179** | 0.183** | 0.157** | 0.176** | 0.232** |
| Caregiver simplified coping style | 0.008 | 0.005 | -0.024 | -0.051 | -0.020 |

***P* < 0.001

***Multivariable regression for predictors of TPD***

To identify independent predictors of TPD among family caregivers of post-stroke disabled older adults, multivariate stepwise linear regression analyses were performed with the total and subscale scores of the TPDAS-FCPSD as dependent variables. Variables with statistically significant differences in univariate and correlation analyses were entered into the models. All VIF values were less than 5, indicating no multicollinearity. Three nested models were constructed: Model 1 included caregiver characteristics, Model 2 included patient characteristics, and Model 3 combined both; Model 3 exhibited the best fit (Table 3 and Table 4).

Results revealed that caregiver-related protective factors included the number of co-caregivers (1 co-caregiver: *β* = −0.174, *P* < 0.05; 2 co-caregivers: *β* = −0.336, *P* < 0.001; ≥3 co-caregivers: *β* = −0.438, *P* < 0.001), social support (*β* = −0.203, *P* < 0.001), and resilience (*β* = −0.202, *P* < 0.001). Depressive symptoms (*β* = 0.244, *P* < 0.001) were identified as a risk factor. Patient disability severity was an independent risk factor with a graded positive association (moderate disability: *β* = 0.089, *P* < 0.05; severe disability: *β* = 0.201, *P* < 0.001; total disability: *β* = 0.249, *P* < 0.001) (Table 3 and Table 4).

After adjusting for the same covariates (Table 4), the number of co-caregivers was the only factor that exerted significant protective effects across all four TPDAS-FCPSD dimensions. Caregiver resilience and severe or total patient disability were common predictors of mental and physical function. Caregiver social support and total patient disability predicted all four dimensions. Caregiver depressive symptoms were only associated with mental function, physical function, and daily living. Having one sibling was only associated with environmental adaptation. All subscale models demonstrated good fit.

Table 3 Characteristics of family caregivers and post-stroke disabled older adults as predictors for TPD

| **Predictors** | **Model I** | |  | **Model II** | |  | **Model III** | |
| --- | --- | --- | --- | --- | --- | --- | --- | --- |
|  | ***β*** | **95% CI** |  | ***β*** | **95% CI** |  | ***β*** | **95% CI** |
| **Caregiver assessments** |  |  |  |  |  |  |  |  |
| *Number of co-caregivers* |  |  |  |  |  |  |  |  |
| None | Ref | Ref |  |  |  |  | Ref | Ref |
| 1 | -0.231** | -13.16 to -4.99 |  |  |  |  | -0.174* | -10.86 to -2.83 |
| 2 | -0.417** | -20.28 to -11.73 |  |  |  |  | -0.336** | -17.08 to -8.71 |
| ≥ 3 | -0.536** | -26.43 to -17.37 |  |  |  |  | -0.438** | -22.39 to -13.41 |
| *Number of siblings* |  |  |  |  |  |  |  |  |
| None | Ref | Ref |  |  |  |  | Ref | Ref |
| 1 | 0.042 | -2.08 - 6.44 |  |  |  |  | 0.067 | -0.54-7.58 |
| 2 | 0.005 | -3.79 - 4.30 |  |  |  |  | 0.004 | -3.66-4.05 |
| 3 | -0.051 | -6.25 - 1.63 |  |  |  |  | -0.048 | -5.91-1.61 |
| ≥ 4 | -0.051 | -5.51 - 1.63 |  |  |  |  | -0.053 | -5.41-1.42 |
| *Caregiver social support* | -0.237** | -0.22 to -0.13 |  |  |  |  | -0.203** | -0.20 to -0.10 |
| *Caregiver resilience* | -0.254** | -0.30 to -0.18 |  |  |  |  | -0.202** | -0.25 to -0.13 |
| *Caregiver depression* | 0.280** | 2.48 - 3.96 |  |  |  |  | 0.244** | 2.10-3.52 |
| **post-stroke disabled older adults assessments** |  |  |  |  |  |  |  |  |
| *Degree of disability* |  |  |  |  |  |  |  |  |
| Mild disability |  |  |  | Ref | Ref |  | Ref | Ref |
| Moderate disability |  |  |  | 0.217** | 3.96-12.33 |  | 0.089* | 0.31-6.36 |
| Severe disability |  |  |  | 0.474** | 14.01-22.54 |  | 0.201** | 4.56-10.93 |
| Total disability |  |  |  | 0.656** | 30.81-41.56 |  | 0.249** | 9.36-18.09 |

Ref = reference group; *β* = standardized regression coefficient; CI = confidence interval

** *P* < 0.001

* *P* < 0.05

Table 4 Multivariate linear regression analysis on total TPDAS-FCPSD and subscales

| Dependent variable and significantly associated variables | Standardized regression coefficient | *P* | 95% CI | VIF |
| --- | --- | --- | --- | --- |
| **Dependent variable:** **total TPDAS-FCPSD score** |  |  |  |  |
| one co-caregiver | -0.174 | 0.001 | -10.86 to -2.83 | 3.448 |
| two co-caregivers | -0.336 | <0.001 | -17.08 to -8.71 | 3.935 |
| ≥3 co-caregivers | -0.438 | <0.001 | -22.39 to -13.41 | 3.982 |
| Caregiver social support | -0.203 | <0.001 | -0.20 to -0.10 | 1.297 |
| Caregiver resilience | -0.202 | <0.001 | -0.25 to -0.13 | 1.324 |
| Caregiver depression | 0.244 | <0.001 | 2.10-3.52 | 1.274 |
| moderate disability* | 0.089 | 0.031 | 0.31-6.36 | 2.148 |
| severe disability* | 0.201 | <0.001 | 4.56-10.93 | 2.256 |
| total disability* | 0.249 | <0.001 | 9.36-18.09 | 2.066 |
| **Dependent variable:** **Mental Functions** |  |  |  |  |
| two co-caregivers | -0.162 | 0.024 | -4.31 to -0.30 | 3.935 |
| ≥3 co-caregivers | -0.279 | <0.001 | -6.39 to -2.08 | 3.982 |
| Caregiver social support | -0.148 | <0.001 | -0.06 to -0.02 | 1.297 |
| Caregiver resilience | -0.239 | <0.001 | -0.11 to -0.05 | 1.324 |
| Caregiver depression | 0.202 | <0.001 | 0.52-1.20 | 1.274 |
| Severe disability* | 0.216 | <0.001 | 1.57-4.63 | 2.256 |
| Total disability* | 0.181 | 0.001 | 1.60-5.79 | 2.066 |
| **Dependent variable:** **Physical Functions** |  |  |  |  |
| two co-caregivers | -0.161 | 0.025 | -4.02 to -0.27 | 3.935 |
| ≥3 co-caregivers | -0.262 | <0.001 | -5.72 to -1.70 | 3.982 |
| Caregiver social support | -0.146 | <0.001 | -0.06 to -0.02 | 1.297 |
| Caregiver resilience | -0.242 | <0.001 | -0.11 to -0.05 | 1.324 |
| Caregiver depression | 0.195 | <0.001 | 0.46-1.10 | 1.274 |
| Severe disability* | 0.248 | <0.001 | 1.89-4.75 | 2.256 |
| Total disability* | 0.182 | 0.001 | 1.52-5.44 | 2.066 |
| **Dependent variable:** **Daily Living** |  |  |  |  |
| two co-caregivers | -0.186 | 0.029 | -5.00 to -0.28 | 3.935 |
| ≥3 co-caregivers | -0.287 | 0.001 | -6.86 to -1.80 | 3.982 |
| Caregiver social support | -0.161 | 0.001 | -0.07 to -0.02 | 1.297 |
| Caregiver depression | 0.221 | <0.001 | 0.54-1.34 | 1.274 |
| Total disability* | 0.144 | 0.020 | 0.47-5.39 | 2.066 |
| **Dependent variable:** **Environmental Adaptation** |  |  |  |  |
| one co-caregiver | -0.331 | <0.001 | -5.86 to -2.13 | 3.448 |
| two co-caregivers | -0.493 | <0.001 | -7.74 to -3.85 | 3.935 |
| ≥3 co-caregivers | -0.449 | <0.001 | -7.71 to -3.54 | 3.982 |
| one sibling | 0.165 | 0.006 | 0.75-4.52 | 2.004 |
| Caregiver social support | -0.122 | 0.012 | -0.05 to -0.01 | 1.297 |
| Total disability* | 0.214 | <0.001 | 1.59-5.65 | 2.066 |

Note: For the total score of the TPDAS-FCPSD, *R*²=0.700, adjusted *R*²=0.689, *F*=68.760, *P*<0.001; for the four dimensions, the results were as follows: Mental Functions Dimension: *R*²=0.497, adjusted *R*²=0.480, *F*=29.200, *P*<0.001; Physical Functions Dimension: *R*²=0.495, adjusted *R*²=0.478, *F*=29.008, *P*<0.001; Daily Living Dimension: *R*²=0.299, adjusted *R*²=0.275, *F*=12.578, *P*<0.001; Environmental Adaptation Dimension: *R*²=0.308, adjusted *R*²=0.285, *F*=13.174, *P*<0.001.

* Characteristic of post-stroke disabled older adults

**Qualitative study**

A total of 23 family caregivers participated in semi‑structured in‑depth interviews. The sample included 7 spouses, 5 daughters, 4 sons, 3 daughters‑in‑law, 2 parents, and 2 siblings, as shown in Table 5. The mean age of participants was 62.3 ± 10.8 years (range: 45–83 years) and were grouped into 10‑year age bands. Most caregivers were female (89.5%). The duration of caregiving ranged from 0.5 to 9 years, and the majority provided full‑time, around‑the‑clock care for post-stroke disabled older adults.

Table 5 Demographic information of family caregivers (N = 23)

| ID | Relationship | Age group | Residence | Working status | Degree of disability of older adults | Daily care hours (avg) | Care years (tot) | TPDAS-FCPSD | |
| --- | --- | --- | --- | --- | --- | --- | --- | --- | --- |
| Score | Category |
| C01 | Spouse | 60-69 | Urban | Retired | Severe | 24 | 4.5 | 58 | Severe |
| C02 | Daughter | 40-49 | Urban | Employed (full-time) | Moderate | 8 | 0.8 | 26 | Moderate |
| C03 | Son | 50-59 | Urban | Employed (part-time) | Severe | 12 | 2.3 | 49 | Severe |
| C04 | Daughter-in-law | 40-49 | Rural | Farmers | Moderate | 20 | 1.1 | 31 | Moderate |
| C05 | Spouse | 70-79 | Urban | Retired | Severe | 24 | 7.2 | 55 | Severe |
| C06 | Mother | 80-89 | Rural | Farmers | Severe | 18 | 0.6 | 52 | Severe |
| C07 | Son | 50-59 | Rural | Farmers | Moderate | 16 | 3.0 | 37 | Moderate |
| C08 | Sister | 60-69 | Rural | Farmers | Severe | 10 | 5.1 | 47 | Severe |
| C09 | Daughter | 50-59 | Urban | Retired | Severe | 24 | 6.8 | 53 | Severe |
| C10 | Spouse | 70-79 | Urban | Retired | Moderate | 20 | 4.2 | 34 | Moderate |
| C11 | Daughter-in-law | 40-49 | Rural | Employed (full-time) | Severe | 14 | 0.9 | 46 | Severe |
| C12 | Father | 70-79 | Rural | Farmers | Severe | 24 | 1.5 | 51 | Severe |
| C13 | Spouse | 60-69 | Rural | Farmers | Moderate | 24 | 8.0 | 39 | Moderate |
| C14 | Daughter | 50-59 | Urban | Employed (part-time) | Severe | 12 | 2.8 | 48 | Severe |
| C15 | Brother | 60-69 | Urban | Retired | Moderate | 8 | 3.5 | 29 | Moderate |
| C16 | Spouse | 70-79 | Urban | Retired | Severe | 22 | 5.7 | 56 | Severe |
| C17 | Daughter | 40-49 | Rural | Unemployed | Moderate | 24 | 0.5 | 25 | Moderate |
| C18 | Son | 50-59 | Urban | Employed (full-time) | Severe | 16 | 1.8 | 45 | Severe |
| C19 | Spouse | 60-69 | Rural | Farmers | Severe | 24 | 6.3 | 54 | Severe |
| C20 | Daughter-in-law | 50-59 | Rural | Employed (part-time) | Moderate | 10 | 2.1 | 33 | Moderate |
| C21 | Spouse | 70-79 | Urban | Retired | Severe | 24 | 0.7 | 50 | Severe |
| C22 | Son | 50-59 | Rural | Farmers | Moderate | 18 | 3.8 | 36 | Moderate |
| C23 | Daughter | 60-69 | Urban | Retired | Severe | 24 | 7.5 | 57 | Severe |

Eight core themes related to third‑party disability among family caregivers were identified from the interviews (illustrative quotes are presented in Table 6), which collectively form a complex framework underlying third‑party disability in caregivers of post-stroke disabled older adults. A qualitative study on Chinese stroke caregivers reported consistent experiences of severe role conflict, insufficient social support and psychological distress, verifying the representativeness of our qualitative findings in the Chinese context [40]. Specifically, Theme 1 indicates that physical and speech dysfunction in post-stroke disabled older adults increases caregivers’ physical burden and caregiving difficulty, and this is further compounded by Theme 2, restricted ADL, which elevates caregiving load; caregiving duties lead to Theme 3, social participation deprivation and role conflict, which is exacerbated by Theme 4, environmental barriers that intensify caregiving challenges; Theme 5 shows that inadequate access to health services leaves caregivers without sufficient professional support, and Theme 6 highlights that mismatches between personal factors and caregiving demands aggravate physical and psychological strain; prolonged accumulation of multiple stressors results in Theme 7, emotional distress and psychological exhaustion, whereas Theme 8 demonstrates that positive experiences and coping mechanisms during caregiving serve as a critical buffer to alleviate caregiving burden and mitigate third‑party disability.

Table 6 Main themes of qualitative analysis and illustrative quotesa

| **Themes** | **Illustrative quotes** |
| --- | --- |
| 1 Personalized Physical-Psychological Burden from Individualized Patient Care Needs (ICF – Body Functions) | “He is completely paralyzed on his right side and his speech is slurred. I have to guess what he needs when he wants water or to turn over; he gets so frustrated that he hits the bed if I guess wrong. Every day I help him get up and do rehabilitation training, and my arms and legs ache so badly I can barely lift them. I’ve developed shoulder bursitis and a herniated lumbar disc.” (C05)  “He has trouble swallowing, so I have to feed him very slowly, one bite at a time, to prevent choking. He cannot turn over by himself, so I have to help him every two hours—even several times at night. I can’t sleep well at all, and I feel completely overwhelmed and exhausted every day.” (C16)  “My father cannot speak or walk and is completely dependent on a wheelchair. Every day I push him outside for sunlight, feed him, and clean his body. These tasks alone take all my energy. He is also very sensitive and gets angry if I don’t understand his gestures, so I have to stay patient and calm him down constantly.” (C02) |
| 2 Cumulative Daily Care Burden Tailored to Specific Dependency Profiles (ICF – Activity Limitations) | “He cannot dress or use the toilet independently. Helping him change clothes takes half an hour every day, and I have to be extremely careful when assisting him to the toilet to prevent falls. I am getting older, so I need to rest for a long time after helping him.” (C06)  “I have to take care of all her meals and bathing. Feeding her takes more than an hour each time, and I have to clean up afterward. In winter, I have to heat water in advance for bathing—it is cold and exhausting.” (C19)  “She cannot even sit steadily and has to lie down all the time. Feeding, dressing changes, and cleaning are all done in bed. I have to use thick bedding and air it often to keep it dry; otherwise, she feels uncomfortable. I am busy from morning till night without a break.” (C12) |
| 3 Individualized Social Disconnection and Personal Role Dissonance (ICF – Participation Restrictions) | “I used to go square dancing every week and have afternoon tea with my female friends. Now, even grocery shopping has to be done in a hurry because of caring for him. I cannot attend gatherings, weddings, or funerals anymore. I feel completely disconnected from the outside world.” (C21)  “My children asked me to help take care of my grandson, but my spouse is totally dependent on me. I feel guilty and sorry for letting them down.” (C13)  “I used to work abroad. Now I devote all my time and energy to caring for him. I can never go back to work; I feel my career is over for good.” (C17) |
| 4 Context-Specific Environmental Barriers to Personalized Care Delivery (ICF – Environmental Factors) | “We live in an old building without an elevator. I cannot move him by myself. We wanted to install an elevator but our neighbors disagreed. I feel anxious every time we go up or down stairs.” (C03)  “The path outside my house is rough and uneven, so I cannot push the wheelchair outside at all. It is very difficult to take him to the clinic; we have to find someone to transport us by tricycle, and it takes a long time every time.” (C08)  “The bathroom is too small to install non-slip mats and handrails. I have to hold him the entire time when he bathes because he could slip easily if he loses balance. I am getting older and do not have the strength to support him.” (C05) |
| 5 Mismatched Health Service Access and Individualized Support Needs (ICF – Environmental Factors – Health Services) | “Community doctors rarely make home visits, and he cannot go to the hospital due to mobility difficulties. We have to call an ambulance for every follow-up, which is expensive and inconvenient. The long-term care insurance covers very few items, and home rehabilitation sessions are limited—this support is far from enough.” (C16)  “Doctors said he needs rehabilitation, but there are no specialized professionals nearby. It takes 30 minutes by car to reach the hospital in town. I can only learn by watching online videos; I don’t know if I’m doing it right. After months of practice with no improvement, I feel extremely anxious and helpless.” (C14)  “Emergencies at night are the most worrying. Last time she had difficulty breathing in the middle of the night, it took a long time for the emergency services to arrive. I was alone at home and had no way to handle it by myself.” (C01) |
| 6 Person-Care "Fit" Gap: Individual Capacity-Demand Misalignment (ICF – Personal Factors) | “I have hypertension and should avoid overexertion, but I cannot rest properly while caring for him, so my blood pressure has been poorly controlled. In rural areas, it is seen as a daughter-in-law’s duty to care for her parents-in-law, so I have to keep going no matter how tired I am. Sometimes I feel so dizzy I can barely stand, yet I still force myself to cook and give medications—I am truly exhausted.” (C11)  “I am illiterate and cannot understand the technical terms on the medicine labels. I also do not know if my rehabilitation techniques are correct, so I just do what feels right. I have no one to ask for help, and I often worry that my ignorance will harm her. I feel extremely anxious and helpless.” (C10)  “I used to be impatient and efficient, but now I have to do everything slowly and patiently to feed and dress him. People say ‘long-term illness tests a filial child,’ and sometimes I lose my temper. Afterwards, I feel guilty and regretful for being harsh toward him. It is very emotionally tormenting.” (C20) |
| 7 Individualized Emotional Trajectories and Personalized Resilience Depletion (ICF – Personal Factors – Psychological Status) | “I worry constantly because his condition fluctuates—one moment he can sit up, and the next he is bedridden. Relatives and neighbors are watching, and I fear being called ‘unfilial’ if I do not care for him well. I cannot sleep soundly at night and keep waking up to check on him.” (C09)  “After long-term, overloaded care, I feel I have lost all patience. I used to comfort him patiently when he lost his temper, but now I sometimes argue with him. No one understands how hard this is for me, and I feel guilty, tired, and wronged afterward.” (C20)  “Our home used to be lively, but it has become gloomy and depressing since he became disabled. Everyone thinks caring for the elderly is just my duty, and no one asks if I am tired. I suddenly feel sad and miss the old days when we worked and cooked together; the more I think about it, the more wronged I feel.” (C13) |
| 8 Personalized Growth and Individualized Adaptive Resources (ICF – Personal Factors – Coping Capacity) | “Last week, my father suddenly called my name clearly. Tears came to my eyes at that moment, and I felt all my hard work over such a long time was worthwhile. Neighbors praised me for being filial, which made me feel encouraged and more motivated to keep helping him with rehabilitation.” (C04)  “When I feel stressed, I call friends who are also caregivers to talk. They understand how I feel and share useful caregiving tips with me. Sometimes I listen to opera to relax, which makes me feel much better.” (C10)  “Now I plan my daily care routine ahead of time: feeding, rehabilitation, and rest are all scheduled clearly. In my spare time, I exchange experience with other caregivers and have learned many useful skills. My life has become much more organized.” (C15) |

a Quotes are translated from Chinese to English

***Theme 1: Personalized Physical-Psychological Burden from Individualized Patient Care Needs***

Physical impairments such as hemiplegia and dysphagia, as well as speech disorders including aphasia and dysarthria in post-stroke disabled older adults, constitute the primary caregiving burden for family caregivers. Caregivers are required to continuously perform physically demanding tasks including feeding, repositioning, and rehabilitation training, which predispose them to musculoskeletal injuries. Meanwhile, they must infer patients’ needs through gestures and guesswork due to impaired communication; this inefficiency increases caregiving difficulty and keeps caregivers in a persistent state of mental tension. The combined physical and psychological strain represents the primary trigger of TPD.

***Theme 2: Cumulative Daily Care Burden Tailored to Specific Dependency Profiles***

Post-stroke disabled older adults are often completely dependent on others for basic ADL, including dressing, toileting, and bathing. Each care task is time-consuming and complex, requiring constant vigilance to prevent falls, choking, and other accidents. Caregivers’ time and energy are fully occupied by fragmented and high-intensity care duties, with many providing 18–24 hours of full-time care daily. Prolonged overexertion leads to severe physical and mental exhaustion, creating a cumulative care burden that further elevates caregivers’ risk of functional impairment.

***Theme 3: Individualized Social Disconnection and Personal Role Dissonance***

Caregiving responsibilities for post-stroke disabled older adults disrupt caregivers’ original lifestyles, forcing them to abandon leisure, social activities, and even career development, leading to gradual social disconnection. They also face conflicting roles as caregivers, parents, and adult children, often experiencing guilt from failing to fulfill other family obligations. Traditional filial piety norms in rural areas add extra psychological pressure. The combined loss of social participation and role conflict severely impairs caregivers’ social functioning and mental well-being.

***Theme 4: Context-Specific Environmental Barriers to Personalized Care Delivery***

Inconvenient residential and community environments substantially magnify caregiving difficulty and burden for those caring for post-stroke disabled older adults. Old urban buildings without elevators or handrails, and rough rural roads, increase the challenges of patient transfer and outdoor mobility, raising accident risks and physical exertion for solo caregivers. Small bathrooms lacking non-slip flooring and grab bars further increase the danger and difficulty of bathing assistance. Poor environmental conditions not only intensify physical strain but also maintain chronic anxiety, accelerating physical and mental burnout.

***Theme 5:*** ***Mismatched Health Service Access and Individualized Support Needs***

Caregivers of post-stroke disabled older adults face substantial barriers in accessing professional health-related services, leaving their care unsupported by formal medical and long-term care resources. Community-based home care and rehabilitation services are scarce; home- and hospital-bound patients experience costly, time-consuming follow-up visits. Long-term care insurance offers limited coverage and restricted home rehabilitation sessions. A lack of professional rehabilitation guidance at the grassroots level forces caregivers to self-train without assurance of technique correctness. Delayed emergency responses during nocturnal health crises often leave caregivers feeling isolated and helpless.

***Theme 6:*** ***Person-Care "Fit" Gap: Individual Capacity-Demand Misalignment***

Caregivers’ health conditions, educational attainment, and personality traits frequently mismatch the rigorous demands of caregiving for post-stroke disabled older adults, worsening strain and psychological distress. Those with chronic conditions such as hypertension struggle to manage their own health amid overwork yet persist due to traditional social expectations. Those with low educational attainment experience anxiety from insufficient professional knowledge and fear of providing inappropriate care. Caregivers with impulsive temperaments find it difficult to adapt to slow care routines, leading to conflict followed by intense guilt and emotional instability.

***Theme 7: Individualized Emotional Trajectories and Personalized Resilience Depletion***

Prolonged high-intensity caregiving for post-stroke disabled older adults places caregivers in multifaceted emotional distress and deep psychological exhaustion. They experience persistent anxiety from fluctuating patient conditions and slow recovery, with constant fear of complications. Overwork and lack of understanding erode patience, triggering irritability, outbursts, and interpersonal conflict. A gloomy home atmosphere and lack of social recognition leave grief unexpressed, accumulating loneliness and helplessness. These factors culminate in clinically significant anxiety and depression, representing a major psychological driver of TPD.

***Theme 8: Personalized Growth and Individualized Adaptive Resources***

Positive experiences and adaptive coping strategies developed during caregiving for post-stroke disabled older adults serve as critical protective factors that buffer TPD and sustain long-term caregiving. Under stress, caregivers relieve emotional burden by communicating with peer caregivers and engaging in relaxing activities; they also enhance mastery through structured care routines and skill learning. Small improvements in patients’ functioning provide strong affirmation and reward for caregivers’ efforts. Recognition from neighbors and shared care from family members supply emotional support and a sense of purpose. Together, these positive experiences effectively resist care-related stress and reduce physical and mental wear.

**Integrating qualitative and quantitative findings**

A joint display approach was used to integrate quantitative and qualitative findings for mutual confirmation, expansion, and supplementation, thereby comprehensively identifying the influencing factors and mechanisms underlying third‑party disability among family caregivers of post-stroke disabled older adults (Table 7). The results demonstrated that third‑party disability in this population arises from complex, multi‑dimensional interactions among multiple factors. Quantitative analyses clarified statistically significant correlations and independent predictive effects of key variables, whereas qualitative inquiries provided in‑depth insights into lived experiences, operational mechanisms, and intrinsic relationships from the caregivers’ perspectives, complementing critical factors and dimensions not captured by quantitative measures. This integrated mixed‑methods design leveraged complementary methodological strengths, yielding a more systematic and comprehensive analysis of influencing factors and establishing a robust foundation for developing personalized intervention strategies to mitigate third‑party disability in caregivers of post-stroke disabled older adults.

Table 7 Merged data from quantitative and qualitative research findings

| Topic | Quantitative findings | Qualitative findings | Integrated findings |
| --- | --- | --- | --- |
| Social Support and Care Resources | Social support was negatively and significantly correlated with TPD and acted as a key protective factor; the number of co-caregivers exerted a gradient protective effect and was the only factor protecting all four dimensions of TPD. | Formal support was insufficient, home-based rehabilitation resources were scarce; informal support was limited with discontinuous assistance from relatives; social empathy was inadequate, and caregivers’ burden was not understood. | **Confirmation:** Social support and co-caregivers were associated with reduced TPD in a dose-dependent manner;  **Expansion:** Social support had structural deficits in three aspects (formal, informal, and empathy);  **Supplement:** Social support exerted a more significant protective effect on the psychological, physical, and environmental adaptation dimensions. |
| Caregiver Psychological Factors | Depressive symptoms were a core risk factor for TPD; resilience was a core protective factor; anxiety was weakly correlated with TPD but had no independent predictive effect. | Caregivers experienced multidimensional emotional exhaustion including depression, guilt, and irritability; anxiety was only an accompanying emotion; long-term care pressure led to decreased resilience. | **Confirmation:** Depression and resilience were core psychological factors;  **Expansion:** Depression was a multidimensional emotional experience, and resilience exhaustion stemmed from long-term pressure;  **Supplement:** Anxiety had no independent predictive effect. |
| Patient Disease Characteristics | Disability severity was an independent risk factor with a gradient effect; severe/complete disability affected caregivers’ psychological and physical functions, and complete disability also impacted daily living and environmental adaptation. | Post-stroke disabled older adults’ physical and speech disorders imposed a dual burden on caregivers; the more severe the disability, the heavier the care burden; disease fluctuations exacerbated caregivers’ anxiety. | **Confirmation:** Disability severity had a dose-effect relationship with TPD;  **Expansion:** Physical disorders caused dual physical and psychological pressure;  **Supplement:** Speech disorders significantly increased care difficulty and psychological pressure. |
| Daily Living and Social Participation | The daily activity dimension of TPD was positively correlated with depression and complete disability; social participation was not directly quantified. | Caregivers’ daily lives were completely disrupted, with severe social isolation and role conflict; rural caregivers also faced filial piety and moral pressure. | **Expansion:** Daily disruption and social isolation were core manifestations of TPD;  **Correlation:** Insufficient support aggravated social isolation and negative emotions;  **Conclusion:** Impairments in daily living and participation were the result of the combined effect of multiple risk factors. |
| Caregiver Personal Characteristics and Care Adaptation | Only being an only child affected the environmental adaptation dimension; demographic characteristics had no independent predictive effect on TPD. | Mismatches between caregivers’ health, educational level, personality and care needs for post-stroke disabled older adults significantly increased pressure; fewer siblings meant no one to share care responsibilities, which was more obvious in rural areas. | **Confirmation:** Fewer siblings affected environmental adaptation through insufficient family support;  **Expansion:** Care fit was more important than demographic characteristics;  **Supplement:** The concept of "care fit" was proposed for personalized interventions. |
| Environmental Factors | The environmental adaptation dimension was affected by social support, co-caregivers, and complete disability. | There were physical barriers such as no elevators, poor roads, and narrow bathrooms; insufficient medical services, slow emergency response, and uneven urban-rural resources. | **Supplement:** Environmental factors were important determinants of TPD and exerted an "amplifying effect"; **Implication:** The environment is modifiable and an important intervention target. |
| Coping Styles and Positive Experiences | The Simplified Coping Style Questionnaire had no significant correlation with TPD; positive experiences were not quantitatively evaluated. | Caregivers adopted effective coping strategies such as talking, planning, and learning; small progress of post-stroke disabled older adults and recognition from family brought positive experiences that buffered TPD. | **Explanation:** The original scale only measured coping types rather than effectiveness;  **Expansion:** Positive experiences had a protective effect; **Conclusion:** Coping effectiveness and positive experiences were the key to reducing pressure. |

**Discussion**

This study used a convergent mixed-methods design to explore the influencing factors and mechanisms of TPD among family caregivers of post-stroke disabled older adults. By systematically integrating quantitative and qualitative findings, we verified core factors through large-sample statistical analysis and revealed caregivers' authentic lived experiences and intrinsic logic. This dual approach offers robust evidence for developing targeted, person-centered interventions that align with UN- WHO healthy aging initiatives and respond to the global call for supportive caregiver environments.

**Core findings and integration with existing literature**

Quantitative results identified three core protective factors for TPD: the number of co-caregivers, social support, and psychological resilience. Two key risk factors emerged: caregivers' depressive symptoms and disability severity among post-stroke disabled older adults. These findings align with prior chronic disease caregiver burden research [10, 41], which underscores social support and shared care as effective stress relievers. Notably, our novel finding of a gradient protective effect of co-caregivers—where protection strengthens with increasing numbers of co-caregivers—supplements existing literature [20], highlighting the critical role of informal support networks in buffering caregiver disability.

The negative correlation between social support and TPD echoes Geerlings et al. [42], who linked social support to enhanced coping capacity, and aligns with the WHO’s health aging framework emphasizing "supportive environments for caregivers" [43]. A recent systematic review and meta-analysis confirmed that dyadic psychoeducational interventions for stroke survivors and caregivers significantly improve both parties’ functional and psychosocial health [44], supporting our finding that caregiver-patient interdependence is a key factor in TPD development.

Qualitative research expanded these quantitative insights by revealing structural deficiencies in social support systems, including scarce formal services, discontinuous informal assistance, and insufficient community empathy. Caregivers described dual physical-psychological burdens arising from post-stroke disabled older adults' combined physical-speech dysfunction, consistent with Jaracz et al. [10], who noted musculoskeletal injuries and communication barriers in stroke caregivers. Additionally, our identification of environmental barriers—such as elevator-less buildings, poor rural roads, and inadequate bathroom facilities—and limited health service access fills critical gaps in quantitative research. These findings align with Mach et al.'s conclusion that environmental factors serve as amplifiers of TPD [41]. These results resonate with UN Sustainable Development Goal (SDG) 3.8 (universal health coverage) and SDG 11 (inclusive cities), emphasizing age-friendly environmental modifications and equitable health service access [43].

The discovery of positive experiences and adaptive coping mechanisms, including patients' rehabilitation progress and peer communication, enriches TPD research perspectives. Unlike most prior studies focusing predominantly on negative factors [45], our study confirms that positive psychological resources actively buffer TPD occurrence and development [46, 47], suggesting that interventions should build upon caregivers' existing strengths rather than merely addressing deficits.

**Implications for Person-Centered Care Practice**

This study provides crucial empirical grounding for operationalizing PCC with family caregivers of stroke survivors—a population frequently overlooked in current PCC implementation [1, 9, 10]. Our findings reveal that effective PCC for caregivers requires moving beyond generic "family support" approaches to individualized, multidimensional intervention tailoring based on modifiable risk profiles identified through our integrated model.

The identification of co-caregiver number as a gradient protective factor across all four TPD dimensions supports PCC's core tenet of collaborative, family-inclusive care planning [1, 10]. Healthcare providers should systematically assess and actively mobilize caregivers' informal support networks as personalized resources, rather than assuming uniform family availability or adopting standardized family engagement protocols.

Domain-specific predictive patterns demonstrate that "one-size-fits-all" interventions are fundamentally insufficient for addressing caregiver TPD. Depression affects mental, physical, and daily living functions but not environmental adaptation, while siblings uniquely influence environmental adaptation. These distinct patterns indicate that person-centered assessment using multidimensional tools like the TPDAS‑FCPSD can guide tailored intervention matching: psychological interventions for high-depression caregivers, environmental modification support for isolated caregivers, and resilience training for those with limited social resources [1, 43].

Qualitative findings illuminate the mechanisms through which PCC principles translate to tangible caregiver outcomes. The "person-care fit" mismatch theme directly embodies the PCC imperative to align care with individual capacities, preferences, and life contexts. Caregivers' narratives consistently revealed that demographic characteristics such as age and education mattered less than whether care demands matched their personal health status, skills, and psychological resources. This finding validates PCC's holistic, individualized assessment approach over traditional categorical risk stratification [1, 5].

Finally, the environmental amplification effect identified in our integrated model suggests that PCC for caregivers must extend beyond individual-level interventions to include personalized environmental modifications (home adaptations, community accessibility) and care coordination that addresses geographic and resource disparities [18, 43].

**Theoretical and practical implications**

Theoretically, this study develops a person-centered, multi-dimensional interaction model of TPD influencing factors encompassing caregivers, post-stroke disabled older adults, social support systems, and environmental contexts. This model validates the ICF framework's applicability to caregiver TPD and extends PCC theory to family caregiver populations [1, 43]. It clarifies core factors' direct predictive effects—such as co-caregiver quantity, depression, and disability severity—while illuminating environmental factors' indirect "amplifier" role, thereby expanding TPD's theoretical connotation in stroke care. The TPDAS‑FCPSD fills the critical gap of insufficient population-specific assessment instruments and supports subsequent research on caregivers of post-stroke disabled older adults [14]. Additionally, the model echoes the UN-WHO health aging initiative by highlighting the interdependence between post-stroke disabled older adults’ care needs and caregivers’ health—an essential premise for "active aging."

At the policy level, findings align with the UN’s "Decade of Healthy Aging (2021-2030)" [43], China’s "14th Five-Year Plan" [21], and Shanghai’s local regulations [23], as well as global PCC implementation frameworks [9, 12, 13]. Governments should recognize caregivers as key stakeholders, optimizing support via tax incentives, flexible work arrangements for sandwich-generation caregivers, and public empathy campaigns. Expanding long-term care insurance coverage and home-based rehabilitation services with personalized care planning components will consolidate family care’s foundational role for post-stroke disabled older adults, ensuring sustainable aging-in-place.

**Strengths and limitations**

A major strength of this study is its convergent mixed-methods design, which integrates the merits of quantitative research (large sample size, generalizable results) and qualitative research (in-depth mechanistic exploration) to overcome the limitations of single-method studies [20]. The large sample of 796 caregiver-patient dyads ensures statistical robustness, while in-depth interviews with 23 caregivers capture real-world challenges that quantitative data cannot fully reveal. The TPDAS‑FCPSD guarantees outcome measurement accuracy for this specific population [14]. The inclusion of both urban and rural caregivers enriches comprehensiveness by reflecting urban-rural disparities.

This study has several limitations. First, convenience sampling from two Shanghai hospitals may restrict generalizability; multi-center studies across diverse regions are needed. Second, the cross-sectional design precludes establishing causal relationships, necessitating longitudinal studies to identify key intervention time windows. Third, factors such as caregivers' health literacy and cultural background were not included, potentially compromising analytical comprehensiveness [48]. Finally, the relatively small qualitative sample (n=23) warrants further exploration with larger samples to confirm emergent themes, particularly urban-rural differences.

**Implications for future research**

Future research should prioritize three translational priorities to bridge the current evidence-to-practice gap. First, develop and validate targeted multi-component interventions (e.g., social support enhancement, psychological counseling, care skill training) through stakeholder-engaged co-design processes, ensuring cultural responsiveness and practical feasibility for diverse caregiver profiles. Effectiveness should be evaluated via randomized controlled trials with embedded implementation science frameworks to assess adoption, fidelity, and scalability in real-world stroke care pathways [49]. Second, explore the mediating and moderating mechanisms between key factors (e.g., social support, psychological resilience) and TPD using longitudinal structural equation modeling, with particular attention to identifying critical intervention time windows during the first 6–12 months post-stroke when caregiver vulnerability peaks. This aligns with the WHO's "life-course approach" to caregiver health and supports the development of stage-matched intervention protocols.

At the clinical implementation level, healthcare systems should leverage the TPDAS-FCPSD for routine risk stratification by integrating it into electronic health record systems with automated referral pathways triggered by domain-specific thresholds (e.g., depression subscale scores ≥10 activating psychological services; environmental adaptation scores ≥6 triggering home modification assessments and community resource navigation). Concurrent cost-effectiveness analyses comparing personalized versus standardized caregiver support packages will inform scalable policy adoption and reimbursement structures, particularly within China's expanding long-term care insurance framework [21, 23].

**Conclusion**

TPD among family caregivers of post-stroke disabled older adults stems from complex interactions among caregiver characteristics, patient conditions, social support, and environmental factors. This person-centered mixed-methods study identified modifiable determinants of caregiver well-being. Our findings support tailored interventions matching specific risk profiles, recognizing family caregivers as essential partners in stroke care. Future research should co-design person-centered interventions with stakeholders to ensure responsive, individualized support.

**Abbreviations**

ADL Activities of Daily Living

BI Barthel Index

CD‑RISC‑10 10‑item Connor‑Davidson Resilience Scale

CI Confidence Interval

GAD‑7 Generalized Anxiety Disorder-7

GSES General Self‑Efficacy Scale

ICF International Classification of Functioning, Disability and Health

PCC Person-Centered Care

SD Standard Deviation

SDG Sustainable Development Goal

SCSQ Simplified Coping Style Questionnaire

SSRS Social Support Rating Scale

TPD Third‑Party Disability

TPDAS‑FCPSD Third‑Party Disability Assessment Scale for Family Caregivers of Older Adults with Post‑Stroke Disability

UN United Nations

VIF Variance Inflation Factor

WHO World Health Organization

**Supplementary Information**

Additional file: Supplemental file 1. Translated interview guide. Supplemental file 2. Code tree.

**Acknowledgements**

We thank all participants for sharing their experiences and supporting this study. We also appreciate the hospitals and rehabilitation centers for assistance with recruitment and data collection.

**Authors’ contributions**

1. Research project: A. Conception, B. Organization, C. Execution; 2. Statistical analysis: A. Design, B. Execution, C. Review and critique; 3. Manuscript preparation: A. Writing of the first draft, B. Review and critique. NL: 1A, 1B, 1C, 2A, 2B, 3A; JYY: 1A, 1B, 1C, 2B, 3A; YQZ: 1B, 2C, 3B; JWQ: 2C, 3B; YLG: 2C, 3B; YL: 1C, 3B; XSR: 1C, 3B; HPY: 1A, 2C, 3B. All authors have read and approved the final manuscript.

**Funding**

This study was supported by the Academic Leaders Training Program of Pudong Health Bureau of Shanghai (Grant No. PWRd2022-16) and the Medical Discipline Construction Program of Shanghai Pudong New Area Health Commission (Key Disciplines Program) (Grant No. PWZxk2022-14).

**Availability of data and materials**

The datasets used and analyzed during the current study are available from the corresponding author upon reasonable request.

**Declarations**

**Ethics approval and consent to participate**

This study was conducted in accordance with the Declaration of Helsinki and approved by the Medical Ethics Committee of Dongfang Hospital Affiliated to Tongji University (Approval No. [2024] Ethical Review No. 127). Written informed consent was obtained from all participants. All data were anonymized and kept confidential. Participants could withdraw at any time without penalty, and all data were used only for this study.

**Consent for publication**

Not applicable.

**Competing interests**

The authors declare that they have no competing interests. The study has yet to be peer-reviewed.

**Author details**

1Department of Nursing, Pudong Gongli Hospital, Shanghai University of Medicine and Health Sciences, 219 Miaopu Road, Pudong New District, Shanghai, 200135, China. 2School of Nursing, Xinjiang Medical University, 567 Shangde North Road, Shuimogou District, Urumqi, Xinjiang, 830054, China. 3School of Medicine, Tongji University, 500 Zhennan Road, Putuo District, Shanghai, 200331, China. 4Department of Physical Examination Center and Pain medicine, Shanghai East Hospital, School of Medicine, Tongji University, 1800 Yuntai Road, Pudong New Area, Shanghai, 200120, China. 5Neurological Rehabilitation Center and Department of Nursing, Shanghai Sunshine Rehabilitation Center, 2209 Guangxing Road, Songjiang District, Shanghai, 201619, China.

**References**

[1] COLLABORATORS G S R F. Global, regional, and national burden of stroke and its risk factors, 1990-2021: a systematic analysis for the Global Burden of Disease Study 2021 [J]. Lancet Neurol, 2024, 23(10): 973-1003. <https://doi.org/10.1016/s1474-4422(24)00369-7>

[2] FEIGIN V L, BRAININ M, NORRVING B, et al. World Stroke Organization (WSO): Global Stroke Fact Sheet 2022 [J]. International Journal of Stroke, 2022, 17(1): 18-29. <https://doi.org/10.1177/17474930211065917>

[3] ZHAO Y, HUA X, REN X, et al. Increasing burden of stroke in China: A systematic review and meta-analysis of prevalence, incidence, mortality, and case fatality [J]. Int J Stroke, 2023, 18(3): 259-67. <https://doi.org/10.1177/17474930221135983>

[4] MARTIN S S, ADAY A W, ALLEN N B, et al. 2025 Heart Disease and Stroke Statistics: A Report of US and Global Data From the American Heart Association [J]. Circulation, 2025, 151(8): e41-e660. <https://doi.org/10.1161/cir.0000000000001303>

[5] MA Q, LI R, WANG L, et al. Temporal trend and attributable risk factors of stroke burden in China, 1990-2019: an analysis for the Global Burden of Disease Study 2019 [J]. Lancet Public Health, 2021, 6(12): e897-e906. <https://doi.org/10.1016/s2468-2667(21)00228-0>

[6] OZEN S, SENLIKCI H B, GUZEL S, et al. Computer Game Assisted Task Specific Exercises in the Treatment of Motor and Cognitive Function and Quality of Life in Stroke: A Randomized Control Study [J]. J Stroke Cerebrovasc Dis, 2021, 30(9): 105991. <https://doi.org/10.1016/j.jstrokecerebrovasdis.2021.105991>

[7] RUI T. Analysis of the Disability Status and Changes of the Elderly Population in China——Based on Data from the 6th and 7th National Population Censuses [J]. Health Economics Research, 2023, 40(03): 6-11. <https://doi.org/10.14055/j.cnki.33-1056/f.2023.03.005>

[8] CHEN Y P, WRIGHT N, GUO Y, et al. Mortality and recurrent vascular events after first incident stroke: a 9-year community-based study of 0.5 million Chinese adults [J]. Lancet Global Health, 2020, 8(4): E580-E90. <https://doi.org/10.1016/s2214-109x(20)30069-3>

[9] MCCORMACK B, MCCANCE T. Person-centred Practice in Nursing and Health Care: Theory and Practice [M]. 2nd ed. Chichester: Wiley-Blackwell, 2017.

[10] JARACZ K, GRABOWSKA-FUDALA B, JARACZ J, et al. Caregiver burden after stroke: a 10-year follow-up study of Polish caregivers for stroke patients [J]. BMC Nurs, 2024, 23(1): 589. <https://doi.org/10.1186/s12912-024-02251-x>

[11] WORLD HEALTH ORGANIZATION. International Classification of Functioning, Disability and Health (ICF) [EB/OL]. 2001 [accessed 2026-01-12].<https://www.who.int/standards/classifications/international-classification-of-functioning-disability-and-health>.

[12] WORLD HEALTH ORGANIZATION. Framework on integrated, people-centred health services [R]. Geneva: WHO, 2016.

[13] WORLD HEALTH ORGANIZATION. Global strategy on integrated people-centred health services 2016-2026: towards universal health coverage [R]. Geneva: WHO, 2021.

[14] LI N, LIAO Y, ZHANG Y, et al. Development and validation of the third-party disability assessment scale for family caregivers of post-stroke disabled elderly [J]. BMC Nurs, 2025, 24(1): 1392. <https://doi.org/10.1186/s12912-025-04019-3>

[15] LI N, ZHANG Y, GAO Y, et al. Third-party disability among family caregivers of older adults with post-stroke disability in mainland China: a qualitative study based on the ICF framework [J]. BMC Geriatr, 2026, 26(1). <https://doi.org/10.1186/s12877-026-07249-5>

[16] DAR R, BIRAN M. "It's not a normal relationship, and it won't be": The impact of aphasia on spouses [J]. Aphasiology, 2024. <https://doi.org/10.1080/02687038.2024.2356285>

[17] STEPHENS D, PYYKKÖ I, KENTALA E, et al. The effects of Ménière's disorder on the patient's significant others [J]. Int J Audiol, 2012, 51(12): 858-63. <https://doi.org/10.3109/14992027.2012.723141>

[18] BEUKES E W, ANDERSSON G, MANCHAIAH V. Third-Party Disability for Significant Others of Individuals with Tinnitus: A Cross-Sectional Survey Design [J]. Audiology research, 2023, 13(3): 378-88. <https://doi.org/10.3390/audiolres13030033>

[19] BEUKES E W, ULEP A J, ANDERSSON G, et al. The Effects of Tinnitus on Significant Other [J]. Journal of clinical medicine, 2022, 11(5). <https://doi.org/10.3390/jcm11051393>

[20] TASHAKKORI A, TEDDLIE C. Sage handbook of mixed methods in social & behavioral research [M]. sage, 2010.

[21] STATE COUNCIL OF THE PEOPLE'S REPUBLIC OF CHINA. 14th Five-Year Plan for the Development of the Elderly Services and Care System [EB/OL]. 2021 [accessed 2026-01-12].<https://www.gov.cn/zhengce/content/2022-02/21/content_5674844.htm>.

[22] GENERAL OFFICE OF THE SHANGHAI MUNICIPAL PEOPLE'S GOVERNMENT. 14th Five-Year Plan for the Development of Shanghai's Elderly Services [EB/OL]. 2021 [accessed 2026-01-12].<https://fgw.sh.gov.cn/sswghgy_zxghwb/20210706/8f00482535e54b49bdbd24f6bbaaae6d.html>.

[23] GENERAL OFFICE OF THE SHANGHAI MUNICIPAL PEOPLE'S GOVERNMENT. Regulations of Shanghai Municipality on Elderly Care Services [EB/OL]. 2021 [accessed 2026-01-12].<https://www.shanghai.gov.cn/ylfwflfg/20230420/dfd20f4a7eb94bc186ae1bdc6ab8d3e4.html>.

[24] BUURMAN B M, VAN MUNSTER B C, KOREVAAR J C, et al. Variability in measuring (instrumental) activities of daily living functioning and functional decline in hospitalized older medical patients: a systematic review [J]. J Clin Epidemiol, 2011, 64(6): 619-27. <https://doi.org/10.1016/j.jclinepi.2010.07.005>

[25] SARAGIH I D, EVERARD G, SARAGIH I S, et al. The beneficial effects of transitional care for patients with stroke: A meta-analysis [J]. J Adv Nurs, 2024, 80(2): 789-806. <https://doi.org/10.1111/jan.15850>

[26] KENDALL M. Multivariate Analysis [M]. London: Charles Griffin & Company Ltd, 1975.

[27] XIE Y N. A preliminary study on the reliability and validity of the Simplified Coping Style Questionnaire [J]. Chinese Journal of Clinical Psychology, 1998, (02): 53-4. <https://doi.org/10.16128/j.cnki.1005-3611.1998.02.018>

[28] XIAO S Y. Theoretical basis and research application of the Social Support Rating Scale [J]. Journal of Clinical Psychiatry, 1994, (02): 98-100.

[29] SCHWARZER R, BÄSSLE J, KWIATEK P, et al. The Assessment of Optimistic Self-beliefs: Comparison of the German, Spanish, and Chinese Versions of the General Self-efficacy Scale [J]. Applied Psychology, 1997, 46(1): 69-88. <https://doi.org/10.1111/j.1464-0597.1997.tb01096.x>

[30] WANG C K, HU, F., LIU, Y. Evidences for Reliability and Validity of the Chinese Version of General SelfEfficacy Scale [J]. Chinese Journal of Applied Psychology, 2001, (01): 37-40. <https://doi.org/10.3969/j.issn.1006-6020.2001.01.007>

[31] CAMPBELL-SILLS L, STEIN M B. Psychometric analysis and refinement of the Connor-davidson Resilience Scale (CD-RISC): Validation of a 10-item measure of resilience [J]. J Trauma Stress, 2007, 20(6): 1019-28. <https://doi.org/10.1002/jts.20271>

[32] ZHANG D M, XIONG, M., LI, Y. Z. The reliability and validity of 10-item Connor-Davidson resilience scale in the community-dwelling older adults [J]. Chinese Journal of Behavioral Medicine and Brain Science, 2018, 27(10): 942-6. <https://doi.org/10.3760/cma.j.issn.1674-6554.2018.10.016>

[33] SPITZER R L, KROENKE K, WILLIAMS J B, et al. A brief measure for assessing generalized anxiety disorder: the GAD-7 [J]. Arch Intern Med, 2006, 166(10): 1092-7. <https://doi.org/10.1001/archinte.166.10.1092>

[34] HE X Y, LI C B, QIAN J, et al. Reliability and validity of a generalized anxiety disorder scale in general hospital outpatients [J]. Shanghai Archives of Psychiatry, 2010, 22(04): 200-3.

[35] KROENKE K, SPITZER R L, WILLIAMS J B. The PHQ-9: validity of a brief depression severity measure [J]. J Gen Intern Med, 2001, 16(9): 606-13. <https://doi.org/10.1046/j.1525-1497.2001.016009606.x>

[36] BIAN C D, HE X Y, QIAN J, et al. The reliability and validity of a modified patient health questionnaire for screening depressive syndrome in general hospital outpatients [J]. Journal of Tongji University (Medical Science), 2009, 30(05): 136-40.

[37] MAHONEY F I, BARTHEL D W. Functional Evaluation: The Barthel Index [J]. Md State Med J, 1965, 14: 61-5.

[38] ZHANG Y J, ZHANG X L, MA Y A, et al. Assessments of reliability of Barthel Index in patients after acute stroke [J]. Chinese Nursing Management, 2007, (05): 30-2. <https://doi.org/10.3969/j.issn.1672-1756.2007.05.011>

[39] GUBA E G. Criteria for Assessing the Trustworthiness of Naturalistic Inquiries [J]. Ectj-Educational Communication and Technology Journal, 1981, 29(2): 75-91.

[40] LU Q, MÅRTENSSON J, ZHAO Y, et al. Living on the edge: Family caregivers' experiences of caring for post-stroke family members in China: A qualitative study [J]. Int J Nurs Stud, 2019, 94: 1-8. <https://doi.org/10.1016/j.ijnurstu.2019.02.016>

[41] MACH H, BAYLOR C, HUNTING POMPON R, et al. Beyond the Patient: A Mixed-Methods Inquiry Into Family Members' Involvement in the Treatment of Parkinson's Disease to Target Third-Party Disability [J]. American journal of speech-language pathology, 2021, 30(1): 169-85. <https://doi.org/10.1044/2020_ajslp-20-00168>

[42] GEERLINGS A D, KAPELLE W M, SEDEREL C J, et al. Caregiver burden in Parkinson's disease: a mixed-methods study [J]. BMC Med, 2023, 21(1): 247. <https://doi.org/10.1186/s12916-023-02933-4>

[43] WORLD HEALTH ORGANIZATION. Decade of healthy ageing: baseline report [R]. Geneva: World Health Organization, 2021.

[44] MOU H, WONG M S, CHIEN W T P. Effectiveness of dyadic psychoeducational intervention for stroke survivors and family caregivers on functional and psychosocial health: A systematic review and meta-analysis [J]. Int J Nurs Stud, 2021, 120: 103969. <https://doi.org/10.1016/j.ijnurstu.2021.103969>

[45] SCARINCI N, WORRALL L, HICKSON L. Factors associated with third-party disability in spouses of older people with hearing impairment [J]. Ear and hearing, 2012, 33(6): 698-708. <https://doi.org/10.1097/AUD.0b013e31825aab39>

[46] WORLD HEALTH ORGANIZATION. Comprehensive Mental Health Action Plan 2013-2030 [R]. Geneva: World Health Organization, 2021.

[47] ALONSO-CANOVAS A, VOETEN J, THOMAS O, et al. The silver linings of Parkinson's disease [J]. NPJ Parkinsons Dis, 2022, 8(1): 21. <https://doi.org/10.1038/s41531-022-00283-1>

[48] WORLD HEALTH ORGANIZATION. Health literacy [R]. Geneva: World Health Organization, 2025.

[49] GIEBEL C, SHRESTHA N, REILLY S, et al. Community-based mental health and well-being interventions for older adults in low- and middle-income countries: a systematic review and meta-analysis [J]. BMC Geriatr, 2022, 22(1): 773. <https://doi.org/10.1186/s12877-022-03453-1>
